# Supplementary material
Source: publisher figshare collection journal article supplement (https://acs.figshare.com/ndownloader/files/3774388)
Supplement: Supplementary file 1 [file 3774388]

Supporting information

## Broad negative thermal expansion operation-temperature window achieved by adjusting Fe-Fe magnetic exchange coupling in $\text{La}(\text{Fe},\text{Si})_{13}$ compounds

Shaopeng Li,<sup>†, §</sup> Rongjin Huang,<sup>\*, †</sup> Yuqiang Zhao,<sup>†, §</sup> Wen Li,<sup>†, §</sup> Wei Wang,<sup>†</sup> Chuanjun Huang,<sup>†</sup> Pifu Gong,<sup>‡, §</sup> Zheshuai Lin,<sup>‡</sup> and Laifeng Li<sup>\*, †</sup>

<sup>†</sup> State Key Laboratory of Technologies in Space Cryogenic Propellants, Technical Institute of Physics and Chemistry, Chinese Academy of Sciences, Beijing, P.R. China

<sup>‡</sup> Beijing Center for Crystal R&D, Key Lab of Functional Crystals and Laser Technology, Technical Institute of Physics and Chemistry (TIPC), Chinese Academy of Sciences (CAS), Beijing, P.R. China

<sup>§</sup> University of Chinese Academy of Sciences, Beijing, P.R. China

\* To whom correspondence should be addressed. E-mail: [huangrongjin@mail.ipc.ac.cn](mailto:huangrongjin@mail.ipc.ac.cn); [laifengli@mail.ipc.ac.cn](mailto:laifengli@mail.ipc.ac.cn)

## The calculated method details of Fe<sup>I</sup>-Fe<sup>II</sup> interatomic distance for LaFe<sub>13-x</sub>Si<sub>x</sub> (x=2.8, 2.9, 3.0, 3.1)

For LaFe<sub>13-x</sub>Si<sub>x</sub> in tetragonal phase exhibiting no negative thermal expansion (NTE) effects, only the cubic phase in the two-phase mixture was considered. In order to investigate the relationship between Si content  $x$  and the Fe-Fe interatomic distance, the first-principles geometry optimization calculations for LaFe<sub>13-x</sub>Si<sub>x</sub> ( $2.8 \leq x \leq 3.1$ ) at 0 K are performed using the plane-wave pseudopotential method<sup>1</sup> implemented in CASTEP package.<sup>2</sup> Virtual Crystal Approximation (VCA)<sup>3,4</sup> is also implemented in the calculations for the statistical distribution in the periodic structure. The initial structures for different Si contents were extrapolated from LaFe<sub>11</sub>Si<sub>2</sub> determined by experiment. The normal-conserving pseudopotential<sup>5</sup> and the generalized gradient approximation (GGA) with Perdew, Burke and Emzerhof (PBE) functionals<sup>6</sup> are chosen to describe the exchange and correlation (XC) potentials in the calculation of the optical properties. The plane-wave cutoff energy was set at 550eV and the Monkhorst-Pack k-point meshes<sup>7</sup> were set with a density of 4×4×4 points in the Brillouin zone.

## REFERENCES

1. Payne, M. C.; Teter, M. P.; Allan, D. C.; Arias, T. A.; Joannopoulos, J. D. *Rev. Mod. Phys.* **1992**, *64*, 1045-1097.
2. Clark, S. J.; Segall, M. D.; Pickard, C. J.; Hasnip, P. J.; Probert, M. J.; Refson, K.; Payne, M. C. *Z Kristallgr* **2005**, *220*, 567-570.
3. Nordheim, L. *I. Ann. Phys.* **1931**, *9*, 607-640.
4. Jaros, M. *Rep. Prog. Phys.* **1985**, *48*, 1091.
5. Lin, J. S.; Qteish, A.; Payne, M. C.; Heine, V. *Phys. Rev. B* **1993**, *47*, 4174-4180.
6. Perdew, J. P.; Burke, K.; Wang, Y. *Phys. Rev. B* **1996**, *54*, 16533-16539.
7. Monkhorst, H. J.; Pack, J. D. *Phys. Rev. B* **1976**, *13*, 5188-5192.
